# Supplementary material for: Analysis of Polar Lipids in Hemp (Cannabis sativa L.) By-Products by Ultra-High Performance Liquid Chromatography and High-Resolution Mass Spectrometry
Source: MDPI journal article supplement (doi:10.3390/molecules27185856), 2022-09-09
Supplement: s1 [file s1]

## SUPPLEMENTARY DOCUMENT

### Analysis of Polar Lipids in Hemp (*Cannabis sativa* L.) By-Products by Ultra-High Performance Liquid Chromatography and High-Resolution Mass Spectrometry

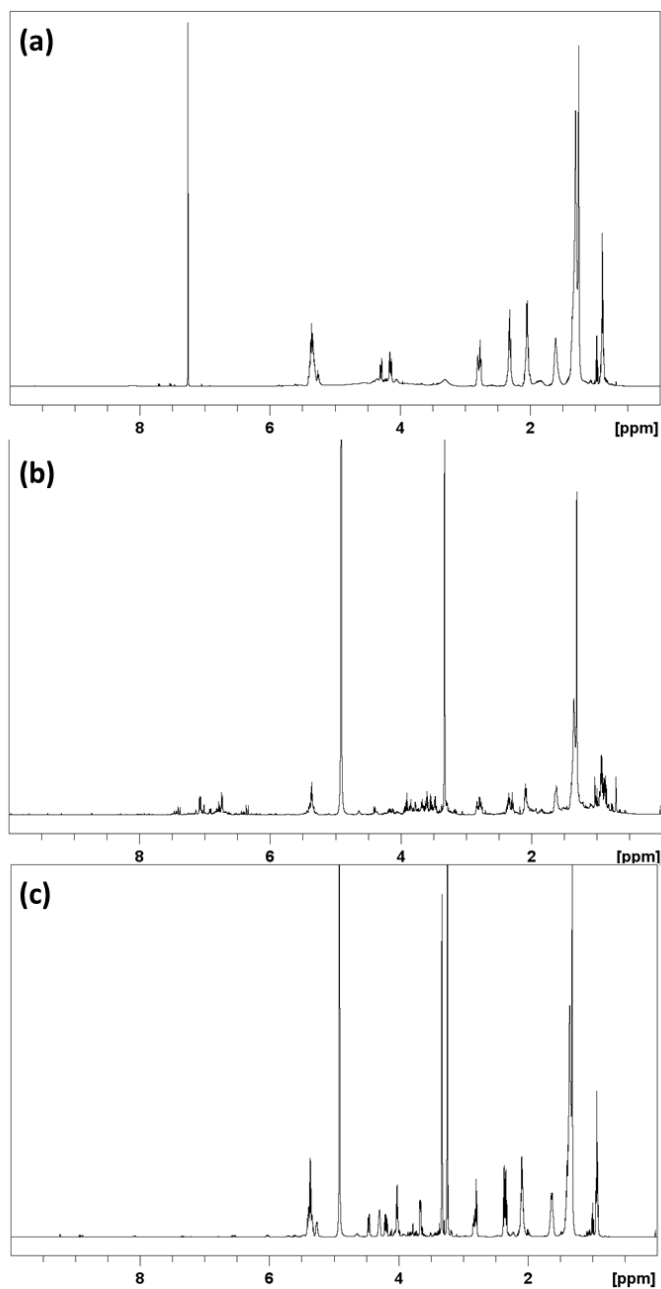

**Figure S1.**  $^1\text{H}$  NMR spectrum of hemp cake SPE fractions chloroform (a) acetone (b) and MeOH (c).

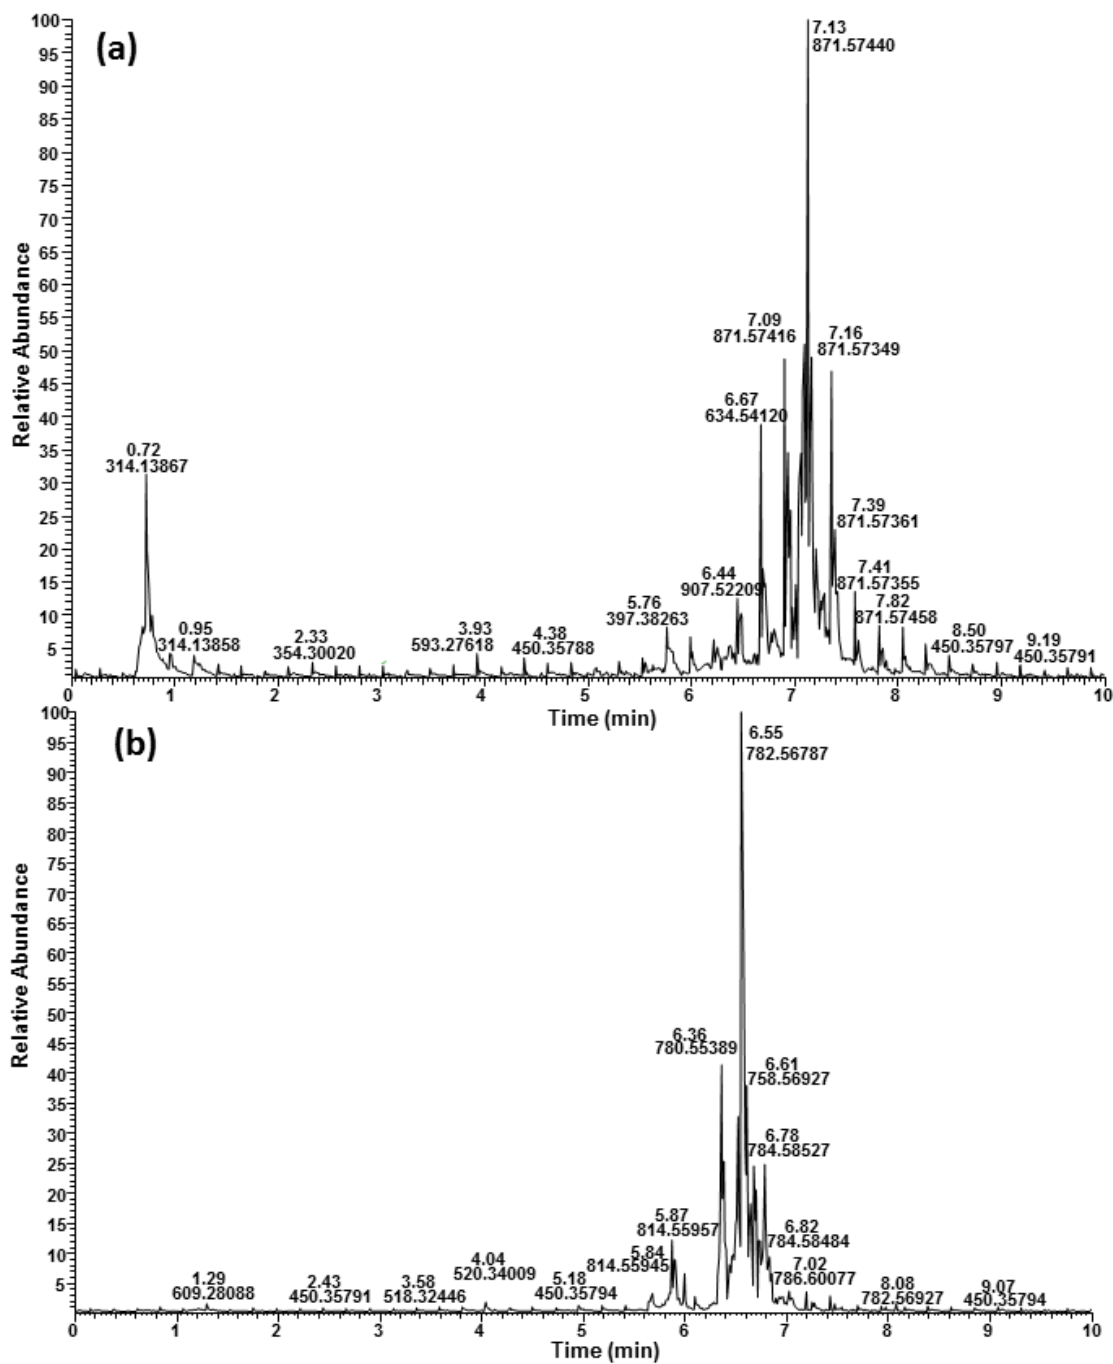

**Figure S2.** TICs of hemp cake SPE fractions acetone (a) and MeOH (b) in positive mode.

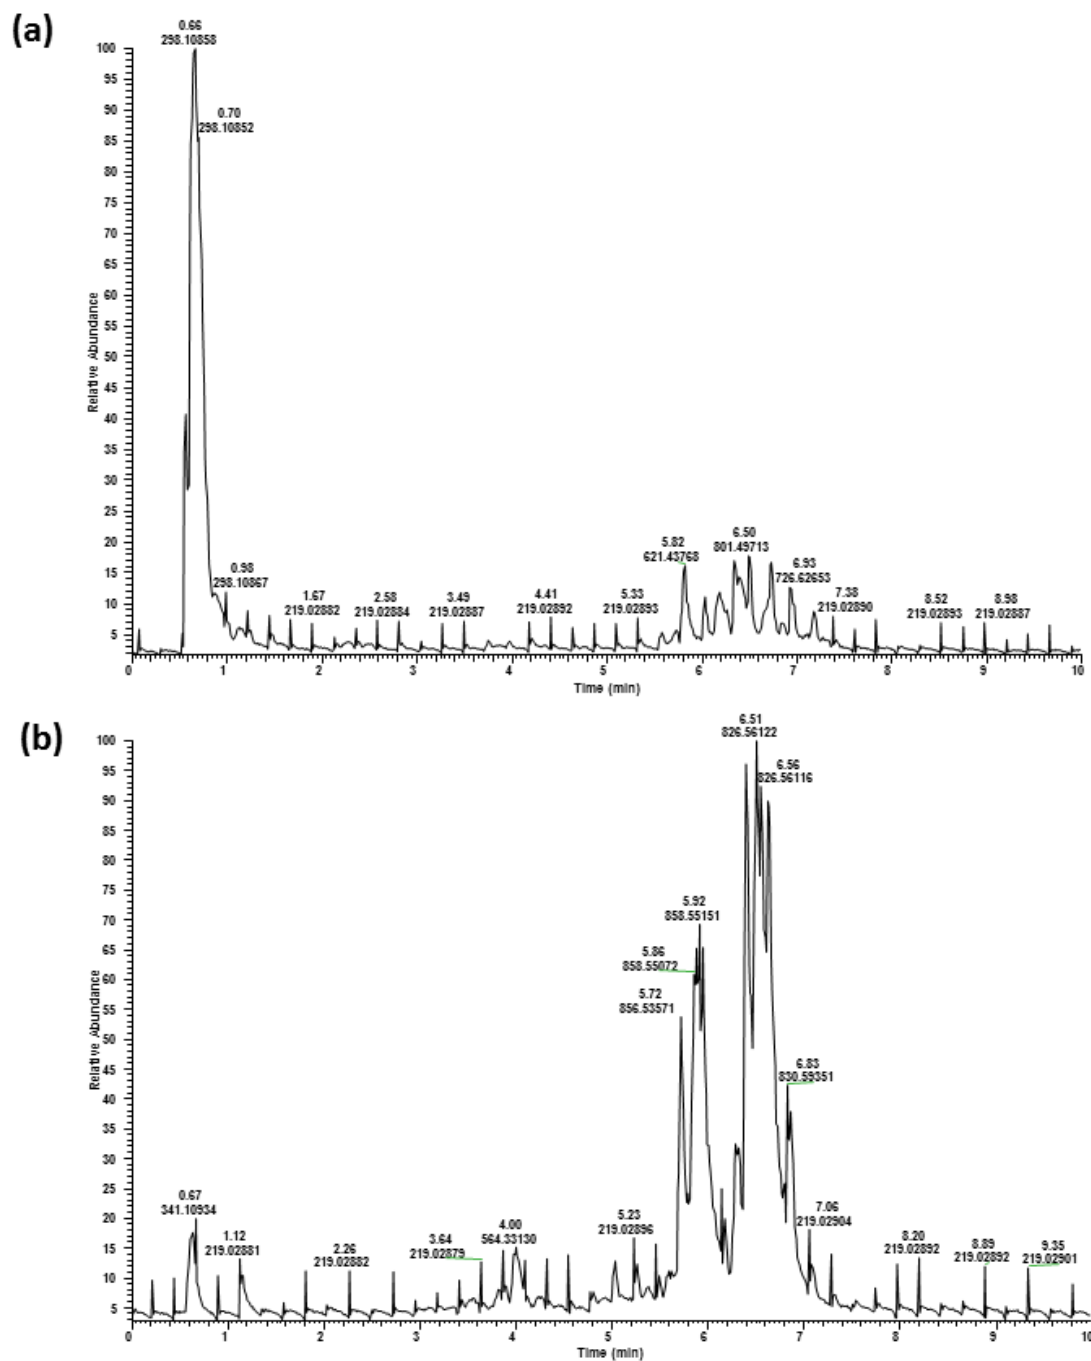

**Figure S3.** TICs of hemp cake SPE fractions acetone (a) and MeOH (b) in negative mode.

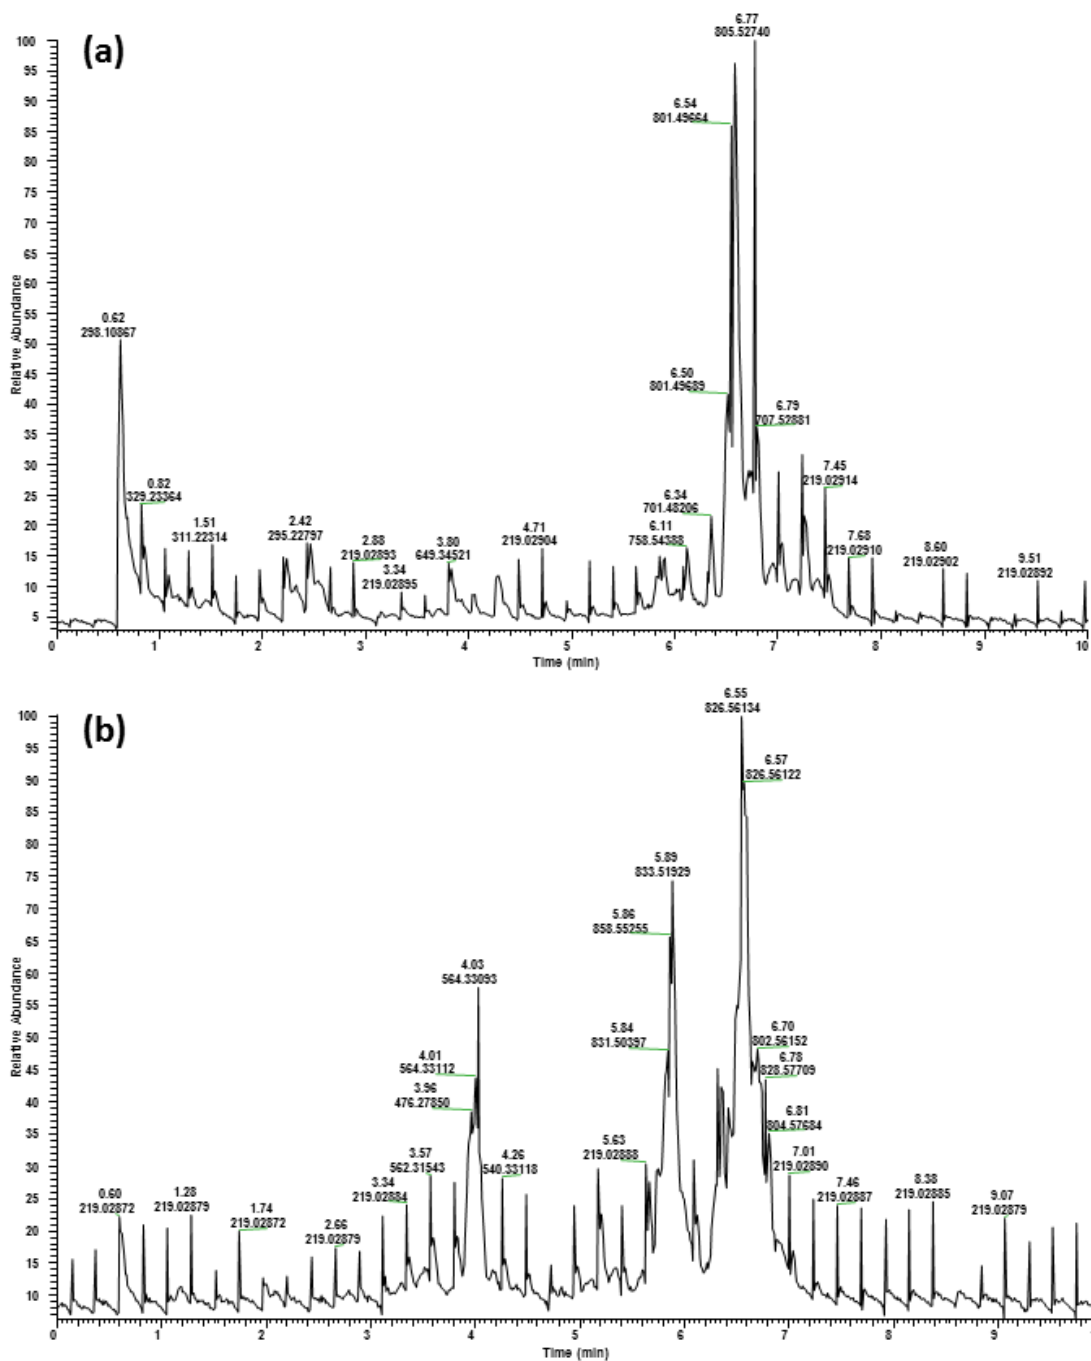

**Figure S4.** TICs of hemp seed hulls SPE fractions acetone (a) and MeOH (b) in negative mode.

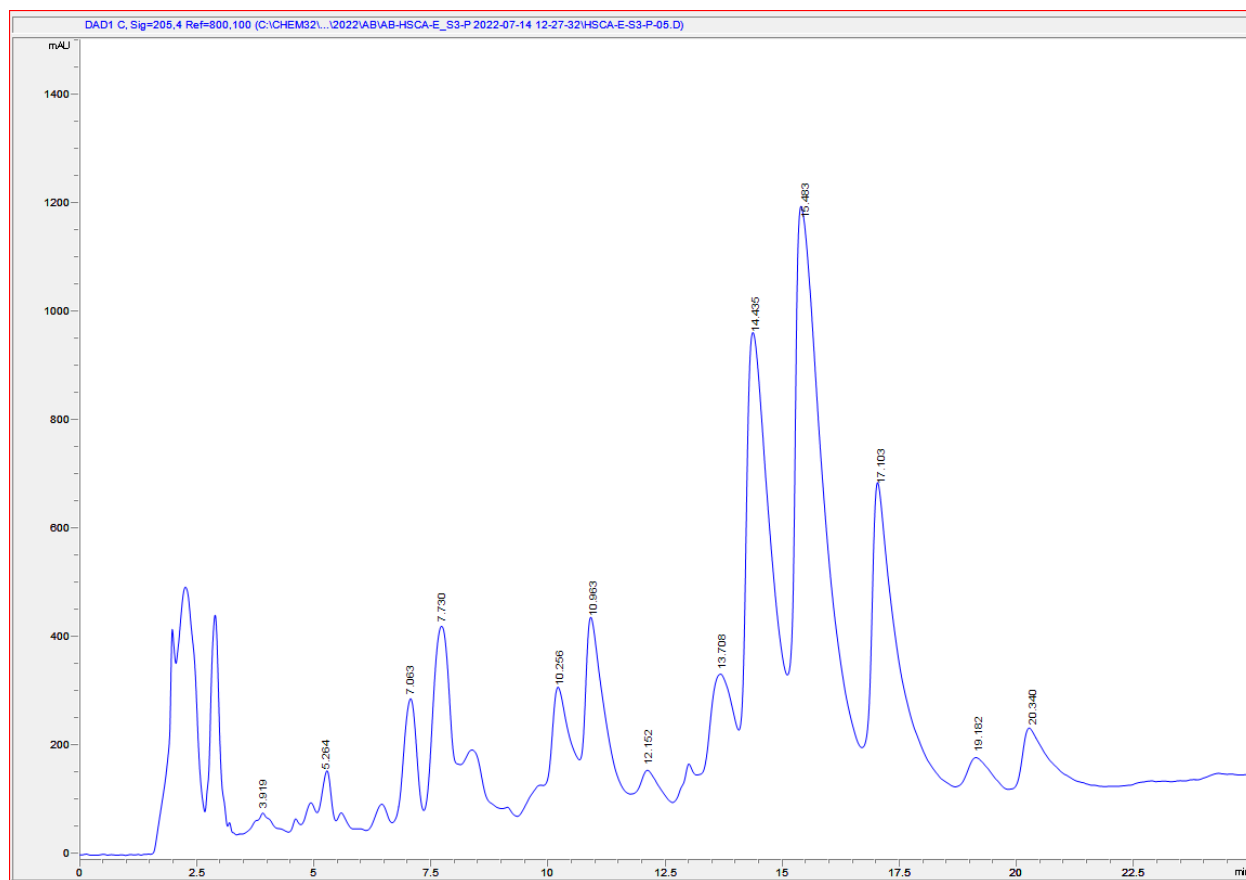

**Figure S5.** HPLC chromatogram of MeOH fraction of hemp cake.

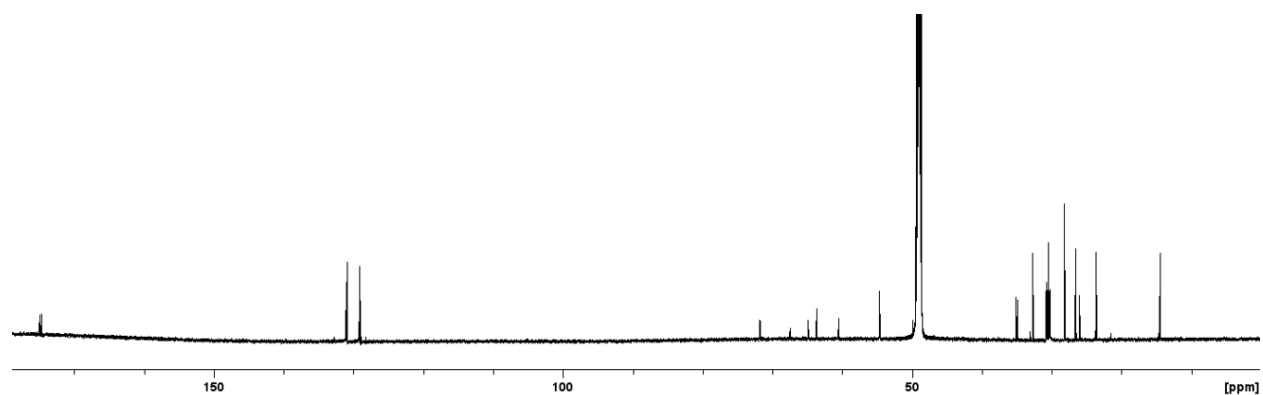

**Figure S6.** The  $^{13}\text{C}$  NMR spectrum of 1,2-di-linoleoylphosphatidylcholine (PC 18:2/18:2) measured in  $\text{CD}_3\text{OD}$ .

(a)

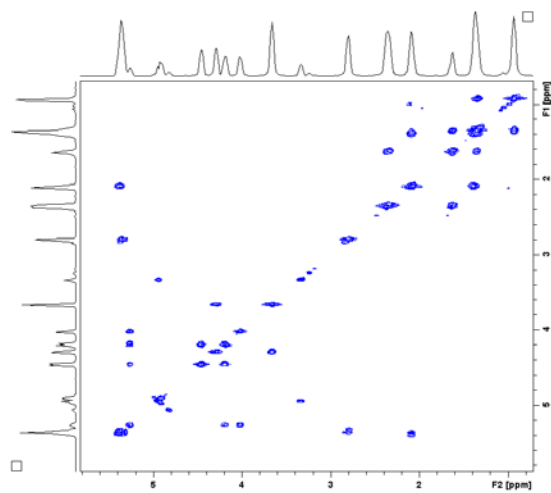

(b)

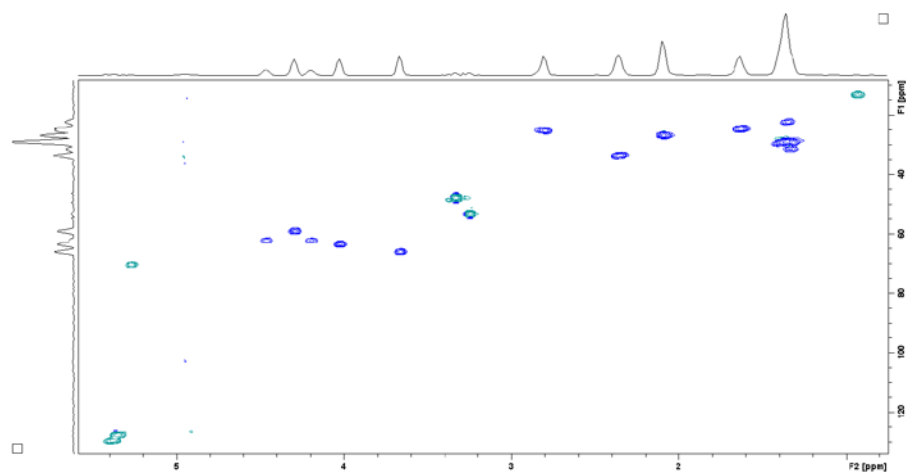

(c)

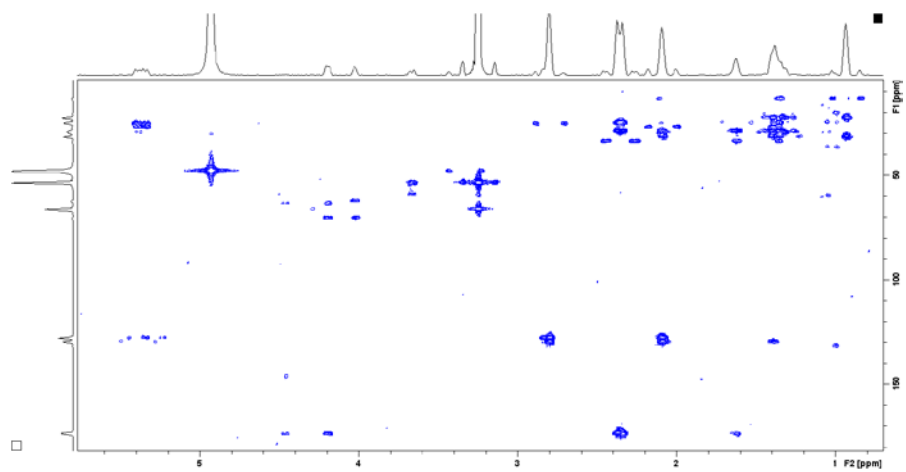

**Figure S7.** 2D-NMR spectra of 1,2-di-linoleoylphosphatidylcholine COSY (a) HSQC (b) and HMBC (c) measured in CD<sub>3</sub>OD.

(a)

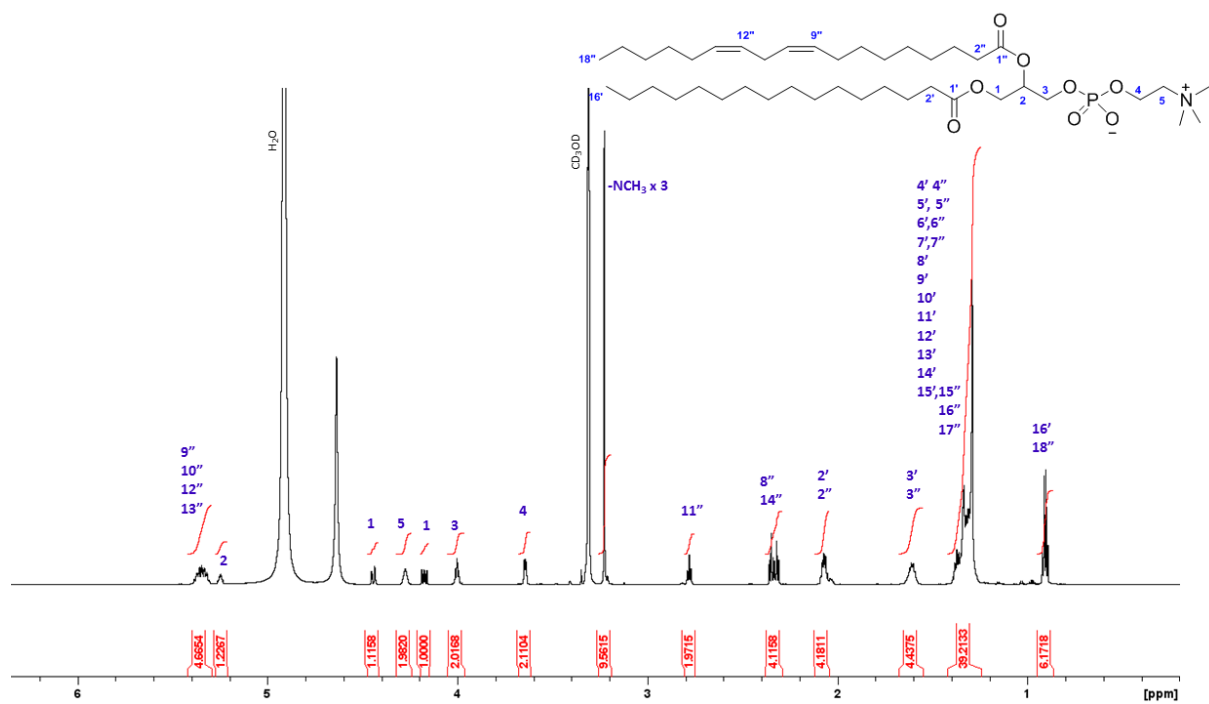

(b)

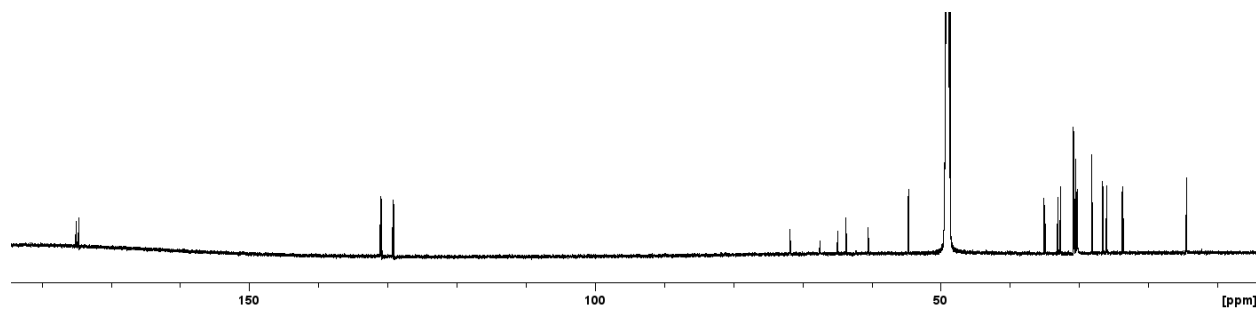

**Figure S8.**  $^1\text{H}$ - (a) and  $^{13}\text{C}$ -NMR spectrum of 1-palmitoyl-2-linoleoylphosphatidylcholine measured in  $\text{CD}_3\text{OD}$ . HRMS  $m/z$  758.56768 [calcd for  $\text{C}_{42}\text{H}_{81}\text{NO}_8\text{P}$  ( $\text{M} + \text{H}$ ) $^+$  758.56943].

(a)

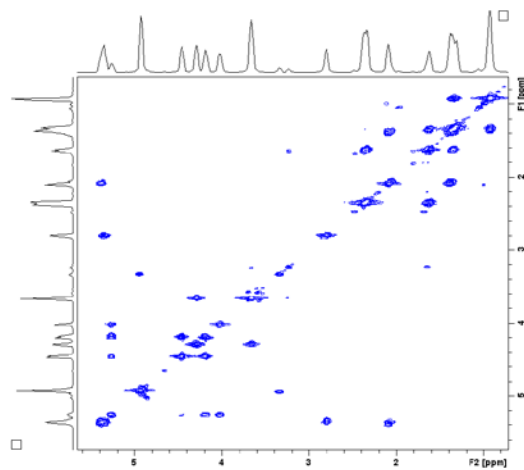

(b)

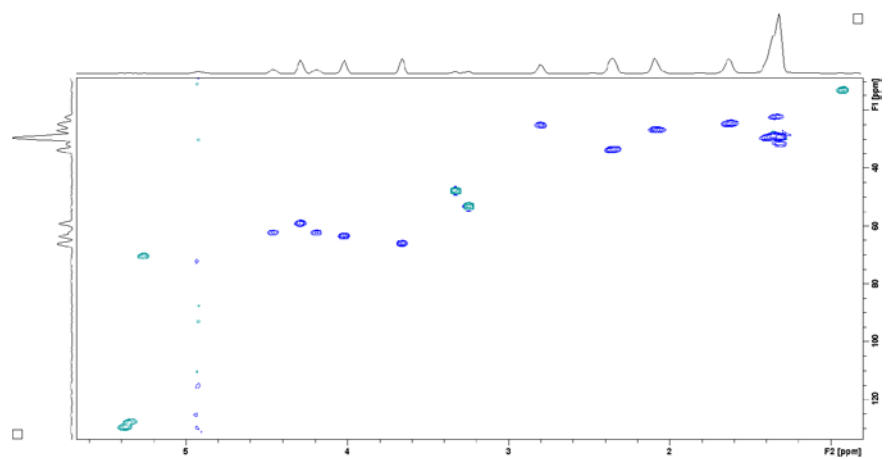

(c)

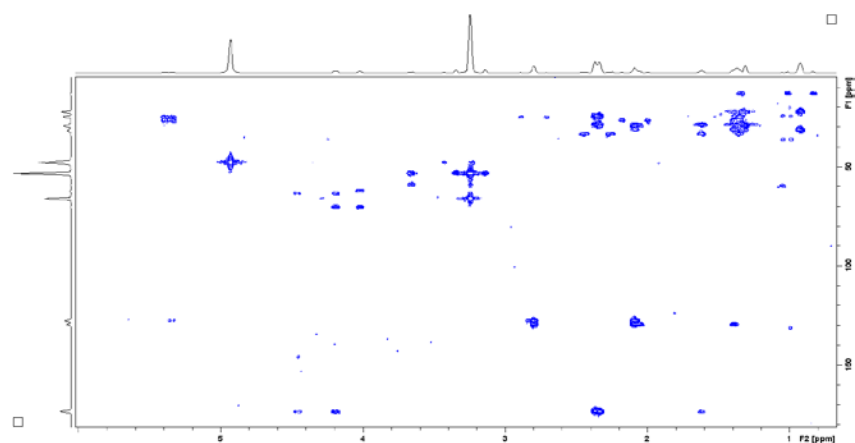

**Figure S9.** 2D-NMR spectra of 1- palmitoyl-2-linoleoylphosphatidylcholine COSY (a) HSQC (b) and HMBC (c) measured in CD<sub>3</sub>OD.



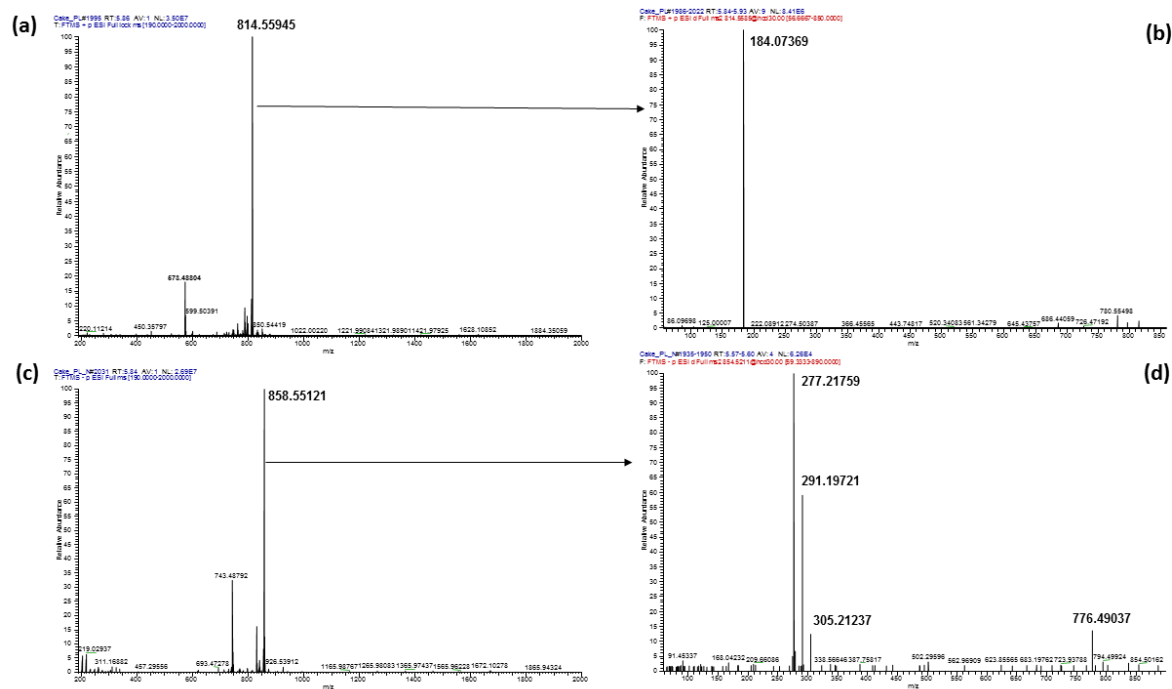

**Figure S10.** Mass spectrum of unknown phospholipid eluted around 6.00 min with molecular ion at  $m/z$  814.55988 in positive mode (a) fragmentation ions of  $m/z$  814.55988 in positive mode (b), mass spectrum of unknown phospholipid with molecular ion at  $m/z$  858.55121 in negative mode (c) fragmentation ions of  $m/z$  858.55121 (d).
